# Supplementary material for: Vortex model of the airborne wind energy systems aerodynamic wake
Source: Copernicus journal article supplement (doi:10.5194/wes-2023-25), 2023-03-03
Supplement: Supplementary file [file wes-2023-25-RC1-supplement.pdf]

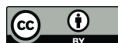

# Vortex model of the airborne wind energy systems aerodynamic wake

Filippo Trevisi<sup>1</sup>, Carlo E.D. Riboldi<sup>1</sup>, and Alessandro Croce<sup>1</sup>

<sup>1</sup>Department of Aerospace Science and Technology, Politecnico di Milano, Via La Masa 34, 20156 Milano, Italy

**Correspondence:** F. Trevisi (filippo.trevisi@polimi.it)

**Abstract.** Understanding and modelling the aerodynamic wake of airborne wind energy systems (AWESs) is crucial for estimating the performance and defining the design of such systems, as tight trajectories increase induced velocities, and thus decrease the available power, while unnecessarily large trajectories increase power losses due to the gravitational potential energy exchange. The aerodynamic wake is here studied with vortex methods, as momentum methods cannot be applied to

5 AWESs in a physically consistent way. The velocities induced at the AWES from a generic helicoidal vortex filament, trailed by a position on the AWES wing, is modelled with an expression for the near vortex filament and one for the far vortex filament. The near vortex filament is modelled as the first half rotation of the helicoidal filament, where its axial component is neglected. The induced drag due to the near wake, built up from near vortex filaments, is found to be similar to the induced drag the AWES would have in forward flight. The far wake is modelled as two semi-infinite vortex rings cascades with opposite  
10 intensity. An approximate solution for the induced axial velocity at the AWES is given as function of the radial (known) and axial (unknown) position of the vortex rings. An explicit and an implicit closure model are introduced to link the axial position of the vortex rings with the other quantities of the model. The aerodynamic model, using the implicit closure model for the far wake, is validated with the lifting line free vortex wake method implemented in QBlade. The model is suitable to be used in time-marching aero-servo-dynamic-elastic simulations and in design and optimization studies.

## 15 1 Introduction

Airborne Wind Energy (AWE) refers to the field of wind energy in which tethered airborne systems are used to harvest wind power at high altitudes. Airborne Wind Energy Systems (AWESs) are typically classified based on their flight operations, which can be crosswind, tether-aligned and rotational as described by Vermillion et al. (2021). Electric power is generated with onboard wind turbines and transferred to the ground through the tether (Fly-Gen) or generated directly on the ground by a  
20 moving or fixed ground station (Ground-Gen). This work focuses on crosswind AWESs and the results are applicable to both Ground-Gen and Fly-Gen systems which are characterized by a single wing.

Lloyd (1980) first derived the power equation for crosswind AWESs, based on given lift and drag coefficients of the AWES. To properly evaluate system performances, special care should be given to the estimation of the drag coefficient, as it includes contributions from the tether drag (see Trevisi et al. (2020a) for more details) and from the induced drag. The latter is the  
25 result of the induced velocities generated by the lifting surface on the lifting surface itself. For wind-harvesting devices, the



induced velocities effectively reduce the incoming wind and thus the available power. Generating high aerodynamic lift could be counterproductive for power generation, as induced velocities grow consequently. For flying wings, the induced velocities effectively rotate the inflow field of an induced angle. As lift is, by its definition, perpendicular to the local velocity, it is rotated by this induced angle, generating an aerodynamic force component parallel to the motion, namely the induced drag. High aerodynamic lift then generates high induced drag, which needs to be compensated by the propulsive thrust.

As AWESs are wind-harvesting devices, the evaluations of the induced velocity is of extreme importance to properly estimate the power production. The effect of the induced velocity can be taken into account by reducing the incoming wind, as typically done for wind turbines, or by including them in the induced drag estimation, as typically done for flying wings.

Learning from conventional wind energy, the induced velocities for AWE are estimated in literature with momentum based and vortex based methods. High fidelity Computational Fluid Dynamics (CFD) methods are typically used to study the wake characteristics and validate lower fidelity models.

Initially, the applicability of momentum methods for AWE was doubted (Loyd (1980); Archer (2013); Costello et al. (2015)), as the definition of swept area is not settled, but by intuition way larger than the AWES wing. Recently, however, momentum methods have been developed for AWE, with De Lellis et al. (2018) and Kheiri et al. (2018, 2019) independently generalizing momentum theory to compute the induced velocity. This is derived by equating the aerodynamic lift of the AWES to the thrust applied to the annulus swept by the wing, with the momentum formulation. The power equations for Fly-Gen and Ground-Gen AWESs are then derived by reducing the incoming wind of the induced velocities. They find that Fly-Gen AWESs have higher power generation potential compared to Ground-Gen. Kaufman-Martin et al. (2021); Kheiri et al. (2022) and Karakouzian et al. (2022) study, with the aim of understanding the interaction of AWESs in a wind farm, the downstream AWES wake shape and characteristics with momentum and mass conservation considerations, finding a good agreement with CFD results.

Gaunaa et al. (2020) point out that using momentum theory to evaluate the induction of an AWES, which is described by 3D polars, is not physically consistent. Momentum theory is indeed used in wind turbine aerodynamics to compute the local velocity triangle of the airfoil (2D polars) in the wind turbine blade. If the AWES is described by 3D polars (i.e. the drag coefficient is including the induced drag coefficient that the AWES would have in a forward flight) in the momentum formulation, then a part of the wake would be counted twice. If, instead, momentum theory is used to evaluate the velocity triangle of an airfoil (2D polars) in the AWES wing, then a root and a tip correction would be needed to take into account that the rotor is not a disc built up of an infinite number of wings, but one single wing. The root and tip corrections for AWESs would however differ largely from conventional wind turbines corrections and need a re-work. Gaunaa et al. (2020) then build a vortex-based engineering model, which is physically consistent and it is tuned with CFD simulations. Another vortex method, based on the vortex tube model, is developed by Leuthold et al. (2019) for an AWE system composed of more wings flying in the same annulus to compute the induction at the AWESs middle-span. This model takes as inputs the system thrust coefficient, relative radius and reel-out factor.

As the field counts a limited number of prototypes with limited number of flying hours, the benchmark of engineering models is typically done with higher fidelity codes, instead of experiments. For aerodynamic models, CFD studies then represent the reference. Haas and Meyers (2017) describe the wake characteristics for a given aircraft in Fly-Gen and Ground-Gen circular



path with a LES setup. Aerodynamic forces, applied with an actuator line technique, are computed to impose an induction of  $1/3$  at the kite location. Haas et al. (2019) further develop the same LES framework by including an optimal control problem for Ground-Gen AWES in non-turbulent and turbulent sheared inflow conditions. Mehr et al. (2020) investigate the aerodynamic interaction of the onboard wind turbines with the main wing in a crosswind circular maneuver with a viscous vortex particle method. The main wing wake is however removed one span downstream from the trailing edge, not resolving the helicoidal wake.

The present work builds on the considerations from Gaunaa et al. (2020) to develop a vortex-based engineering model, which is physically consistent. The use of vortex methods, described by Branlard (2017), allows to model the induction at the AWES due to its own wake. The goal of this work is analytically study the AWES wake, by modelling how geometrical and aerodynamic quantities influence the induced velocities. This model can be used to find how the induced velocities varies along the wing span and to refine the power equations.

An analytical model of the helicoidal wake will inform about the validity bounds of the straight wake assumption, employed in the engineering models (Bauer et al. (2018); Trevisi et al. (2020b) among others) and in computational studies focusing on the aerodynamic characterization of the AWES (Viré et al. (2020); Castro-Fernández et al. (2021) among others).

Modelling the induced velocities along the wing span will instead improve the engineering aerodynamic models for loads estimation (Damiani et al. (2019)) and hereby the flight dynamic models (Trevisi et al. (2021a)).

A refined power equation, including the contribution from the helicoidal wake, will inform the designer in an intuitive way about the effects of changing geometrical and aerodynamic quantities on the overall performance. This could be used in low fidelity system design and optimization studies (Bauer et al. (2018); Trevisi et al. (2021b) among others). The power equation refinement will be performed in an imminent work to limit this paper scope and length.

This paper is organized as follows: In Sect. 2, the modelling of the induction produced by a helicoidal vortex filament is introduced. The helicoidal vortex filament can be described as a near vortex filament, modelled by half revolution of the filament in the rotor plane, and a far vortex filament, modelled by an infinite series of vortex rings. In Sect. 3, the near wake model and the relative induced drag coefficient are derived. In Sect. 4, the far wake model, which depends on the radial (known) and axial (unknown) position of the vortex rings is derived. An explicit and an implicit model are proposed to find the axial position. In Sect. 5, the model is validated with QBlade, which uses a lifting line free vortex wake method. In Sect. 6, the main conclusions are discussed.

## 2 Modelling of a helicoidal vortex filament

In this section, the modelling framework of the induced velocities produced by a non-expanding helicoidal vortex filament is introduced. As the induced velocities at a given point are found by integrating the contributions of the vortex filaments composing the aerodynamic wake, they are first studied in this section. The formulation introduced in this section will be used to derive a near and a far wake model in the next sections.

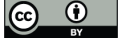

AWESs flying crosswind typically follow a circular or a figure-of-eight pattern. The present work analyzes the wake produced by **circular trajectories**, which are contained in a plane perpendicular to the incoming wind, as in Fig. 1. It is here  
 95 assumed that the AWES has a constant rotational speed and its wings are on the rotational plane. This condition is also considered by the other studies concerning AWES wakes (e.g. De Lellis et al. (2018); Kheiri et al. (2018); Gaunaa et al. (2020); Kaufman-Martin et al. (2021)). Moreover, Trevisi et al. (2022a) show that these are the optimal trajectories for a Fly-Gen maximizing thrust power with constant inflow. Optimal trajectories for a Fly-Gen maximizing electric power including wind shear can be understood as a perturbation of this solution. Additionally, one can study the flight mechanics of the AWES about  
 100 this condition (Trevisi et al. (2021a)).

Referring to Fig. 1, the AWES moves along a circular trajectory in the plane  $(e_1, e_2)$  with radius  $R_0$ . The versor  $e_3$  points upwind and therefore the wind velocity is  $v_w = -v_w e_3$ . For Ground-Gen AWESs, the relative wind velocity at the AWES is  $v_r = v_w - v_o$ , where  $v_o = -v_o e_3$  is the reel-out velocity of the tether, assumed to be only along the axial direction. For Fly-Gen AWESs, the relative wind velocity at the AWES coincides with the wind speed  $v_r = v_w$ , as the tether is fixed at the ground  
 105 station. The vortices trailed by the AWES are transported downwind by the wind and have a helicoidal shape. Following the assumptions of Prandtl and Goldstein in the derivation of the tip-loss correction for wind turbines, it is assumed no distortion and expansion of the wake (Branlard (2017)).

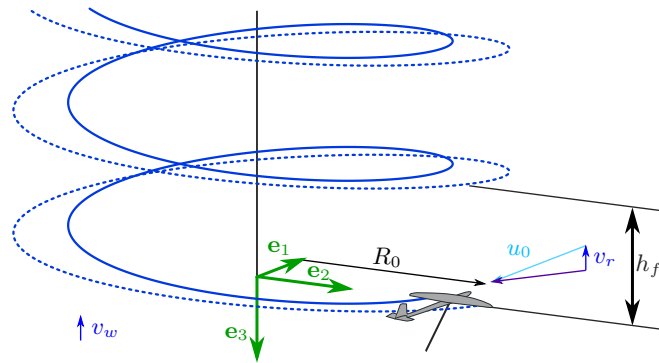

**Figure 1.** Wake structure of an AWES flying circular trajectories. The solid and dashed lines represent the left and right rolled up vortices respectively.

The geometry of the helicoidal vortex filament is shown in Fig. 2a. The radius of the filament is  $R_f$  and the pitch  $h_f$ . The induction is evaluated at a generic point  $p_j$ , with radius  $R_j$ . With these definitions, the radial difference  $\Delta R$  between the  
 110 evaluation point and the filament is

$$\Delta R = R_j - R_f, \quad (1)$$

and it is normalized with the evaluation radius as

$$\eta = \frac{\Delta R}{R_j} = 1 - \frac{R_f}{R_j}. \quad (2)$$

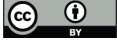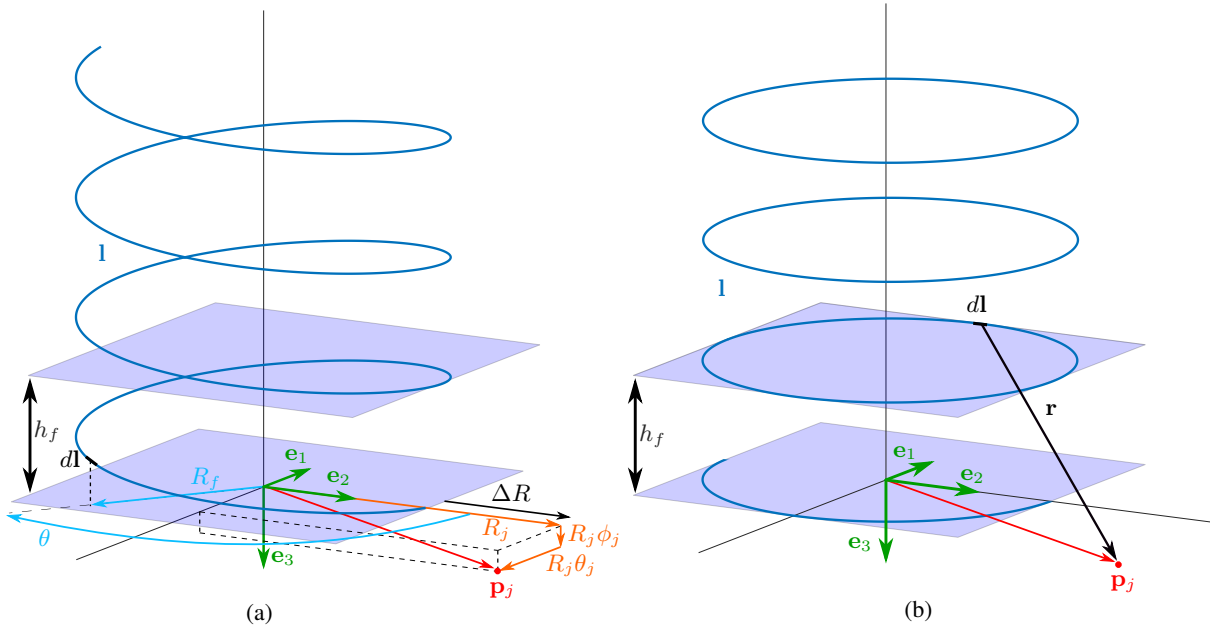

**Figure 2.** (a) Helicoidal vortex filament and (b) relative modelling after assumptions.

Note that  $\eta = 0$  when  $\Delta R = 0$ ,  $\eta = 1$  when  $R_j \rightarrow +\infty$  and  $\eta \rightarrow -\infty$  when  $R_j \rightarrow 0$ . The normalized position of the vortex  
 115 filament with respect to the mid-span turning radius  $R_0$  (see Fig. 1) is indicated as

$$\eta_0 = \frac{R_0 - R_f}{R_0} = -\frac{y_f}{R_0}, \quad (3)$$

where  $y_f$  indicates the position of the vortex filament along the wing span direction. The filament radius  $R_f$  can then be expressed as

$$R_f = R_j(1 - \eta) = R_0(1 - \eta_0). \quad (4)$$

120 The helix can be modelled as

$$\boldsymbol{l} = \begin{bmatrix} -R_f \sin(\theta) \\ R_f \cos(\theta) \\ -\frac{h_f}{2\pi} \theta \end{bmatrix} = R_j(1 - \eta) \begin{bmatrix} -\sin(\theta) \\ \cos(\theta) \\ -\frac{1}{1 - \eta_0} \frac{\theta}{\lambda_0} \end{bmatrix}, \quad (5)$$

where  $\frac{R_0}{R_j} = \frac{1 - \eta}{1 - \eta_0}$  (Eq. 4),  $\theta \in [0, \infty[$  is the angular parameter of the helix, it is assumed that the helix pitch of any vortex  
 filament  $h_f$  trailed by the wing is equal to the helix pitch  $h_0$  of the vortex filament at the wing center and the normalized  
 torsional parameter  $\lambda_0$  (Branlard (2017)) is the ratio between the projected circumference length  $2\pi R_0$  and the helix pitch  $h_0$   
 125 of the vortex filament

$$\lambda_0 = \frac{2\pi R_0}{h_0}. \quad (6)$$

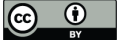

The induced velocities  $w_{j,f}$  produced by the filament of vorticity  $\Gamma$  at a point  $p_j$  is found using Biot-Savat law

$$w_{j,f} = \frac{\Gamma}{4\pi} \int_0^{+\infty} \frac{dl \times r}{|r|^3} d\theta, \quad (7)$$

where

$$130 \quad dl = -R_j(1-\eta) \begin{bmatrix} \cos(\theta) \\ \sin(\theta) \\ \frac{1}{(1-\eta_0)\lambda_0} \end{bmatrix} d\theta, \quad (8)$$

and  $r = p_j - l$ . As the vortex filaments are trailed by the wing and the evaluation point is typically on the aircraft itself,  $p_j$  is modelled as

$$p_j = \begin{bmatrix} -R_j\theta_j \\ R_j \\ R_j\phi_j \end{bmatrix}, \quad (9)$$

135 where  $\theta_j$  and  $\phi_j$  define the three dimensional position of the evaluation point and are assumed to be small (see Fig. 2a).  $r$  can then be expressed as

$$r = R_j \begin{bmatrix} -\theta_j \\ 1 \\ \phi_j \end{bmatrix} - R_j(1-\eta) \begin{bmatrix} -\sin(\theta) \\ \cos(\theta) \\ -\frac{\theta}{(1-\eta_0)\lambda_0} \end{bmatrix} = -R_j \begin{bmatrix} \theta_j - (1-\eta)\sin(\theta) \\ (1-\eta)\cos(\theta) - 1 \\ -\phi_j - \frac{1-\eta}{1-\eta_0} \frac{\theta}{\lambda_0} \end{bmatrix}. \quad (10)$$

When looking for the axial induced velocity  $w_{j,f} = w_{j,f} \cdot e_3$ , the third component of the numerator of Eq. (7) becomes

$$(dl \times r) \cdot e_3 = R_j^2(1-\eta)((1-\eta) - \cos(\theta - \theta_j)). \quad (11)$$

The norm of  $r$  squared can be expressed as

$$140 \quad |r|^2 \approx R_j^2 \left[ 1 - 2(1-\eta)\cos(\theta - \theta_j) + (1-\eta)^2 + 2\phi_j \left( \frac{1-\eta}{1-\eta_0} \frac{\theta}{\lambda_0} \right) + \left( \frac{1-\eta}{1-\eta_0} \frac{\theta}{\lambda_0} \right)^2 \right]. \quad (12)$$

Finally, Biot-Savat law (Eq. 7) can then be written considering Eq. (11) and (12)

$$w_{j,f} = -\frac{\Gamma}{4\pi\Delta R} \int_0^{+\infty} \frac{\eta(1-\eta)(\cos(\theta - \theta_j) - (1-\eta))}{\left( 1 - 2(1-\eta)\cos(\theta - \theta_j) + (1-\eta)^2 + 2\phi_j \left( \frac{1-\eta}{1-\eta_0} \frac{\theta}{\lambda_0} \right) + \left( \frac{1-\eta}{1-\eta_0} \frac{\theta}{\lambda_0} \right)^2 \right)^{\frac{3}{2}}} d\theta, \quad (13)$$

where the term outside the integral is the solution for a straight vortex filament and the integral can be understood as a shape factor multiplying it.

145 The integral can be re-written as a infinite summation of integrals by properly re-writing the non-periodic terms

$$w_{j,f} = -\frac{\Gamma}{4\pi\Delta R} \left[ \overbrace{\int_0^\pi \frac{\eta(1-\eta)(\cos(\theta-\theta_j) - (1-\eta))}{\left(1 - 2(1-\eta)\cos(\theta-\theta_j) + (1-\eta)^2 + 2\phi_j \left(\frac{1-\eta}{1-\eta_0} \frac{\theta}{\lambda_0}\right) + \left(\frac{1-\eta}{1-\eta_0} \frac{\theta}{\lambda_0}\right)^2\right)^{\frac{3}{2}}} d\theta}^{\Upsilon^n: \text{near vortex filament}} + \underbrace{\sum_{k=1}^{\infty} \int_{-\pi}^{\pi} \frac{\eta(1-\eta)(\cos(\theta-\theta_j) - (1-\eta))}{\left(1 - 2(1-\eta)\cos(\theta-\theta_j) + (1-\eta)^2 + 2\phi_j \left(\frac{1-\eta}{1-\eta_0} \frac{(2\pi k+\theta)}{\lambda_0}\right) + \left(\frac{1-\eta}{1-\eta_0} \frac{(2\pi k+\theta)}{\lambda_0}\right)^2\right)^{\frac{3}{2}}} d\theta}_{\text{far vortex filament}} \right]. \quad (14)$$

In Eq. 14 a distinction between near and far vortex filament is done, noting that the near vortex filament (i.e. the first integral) models the induction produced by the first half revolution of the filament, whereas the far vortexes are modeled through the infinite summation of integrals.

150 The integrals modelling the near and the far vortex filament have terms proportional to  $\theta$  at the denominator. These terms physically represent the contribution to  $|\mathbf{r}'|$  from the projection of  $\mathbf{r}$  along  $\mathbf{e}_3$  and they have a maximum value at  $\theta = \pm\pi$ , which is also where the projection of  $\mathbf{r}$  in the  $(\mathbf{e}_1, \mathbf{e}_2)$  plane is largest. This suggests that the overall contribution of the terms proportional to  $\theta$  to the integral should be limited.

In Fig. 3, the near vortex filament shape function  $\Upsilon^n$  (Eq. 14), computed for typical values of  $\frac{1}{1-\eta_0} \frac{1}{\lambda_0}$ , is presented (a detailed analysis of  $\lambda_0$  for the aerodynamic wake of AWESs is given in Sect. 4), showing that the solution does not heavily depend on this parameter for values of  $\eta$  close to zero. When looking at the induction on the AWES produced by the AWES itself, values of  $\eta$  are expected to be close to 0. These considerations suggest to neglect the terms proportional to  $\theta$  in the modelling. The physical interpretation of  $\Upsilon^n$  is given in Sect. 3.

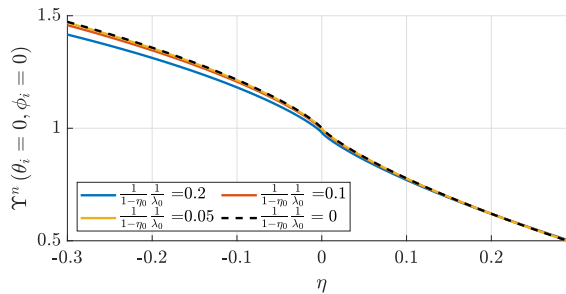

**Figure 3.** Numerical solution of the integral modelling the flat near vortex filament  $\Upsilon^n$ , for different values of  $\frac{1}{1-\eta_0} \frac{1}{\lambda_0}$ .

By neglecting the terms proportional to  $\theta$ , the helicoidal vortex filament of Fig. 2a is modelled as half a vortex ring plus a semi-infinite vortex ring cascade, as in Fig. 2b.

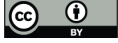

The axial velocity at point  $p_j$ , induced by the idealized helicoidal vortex filament, is then modelled as

$$w_{j,f} \approx -\frac{\Gamma}{4\pi\Delta R} \left[ \int_0^\pi \frac{\overbrace{\eta(1-\eta)(\cos(\theta-\theta_j)-(1-\eta))}^{\Upsilon^n}}{\left(1-2(1-\eta)\cos(\theta-\theta_j)+(1-\eta)^2\right)^{\frac{3}{2}}} d\theta + \sum_{k=1}^{\infty} \int_{-\pi}^{\pi} \frac{\eta(1-\eta)(\cos(\theta-\theta_j)-(1-\eta))}{\left(1-2(1-\eta)\cos(\theta-\theta_j)+(1-\eta)^2+2\phi_j\left(\frac{1-\eta}{1-\eta_0}\frac{2\pi k}{\lambda_0}\right)+\left(\frac{1-\eta}{1-\eta_0}\frac{2\pi k}{\lambda_0}\right)^2\right)^{\frac{3}{2}}} d\theta \right]. \quad (15)$$

The integrals involved in Eq. (15) have now a closed form solution, which will be used to derive a near and a far wake model in the next sections.

### 165 3 Near wake model

In Sect. 2, the axial induced velocity produced by a helical vortex filament is modelled as half a vortex ring plus a semi-infinite vortex ring cascade, as in Fig. 2b. In this section, a near wake model is developed based on this idealization. The velocities induced by vortex rings have an analytical solution, which are used in this section to derive a near wake model.

This section is organized as follows: In Sect. 3.1, the closed form solution of the velocity induced by the near vortex filament and its linearized version are derived. In Sect. 3.2, the circulation of an elliptic wing flying in a circular trajectory is introduced to find the related trailed vorticity. In Sect. 3.3, the velocities induced by the trailed vortices on the lifting line of the elliptic wing are found. This allows to define an induced drag coefficient modelling the near wake.

#### 3.1 Velocity induced by the near vortex filament

The axial velocity at point  $p_j$  induced by the near vortex filament of intensity  $d\Gamma$  is (Eq. 15)

$$175 \quad dw_{j,f}^n = -\frac{d\Gamma}{4\pi\Delta R} \int_0^\pi \frac{\eta(1-\eta)\cos(\theta-\theta_j)-\eta(1-\eta)^2}{\left(1+(1-\eta)^2-2(1-\eta)\cos(\theta-\theta_j)\right)^{\frac{3}{2}}} d\theta = -\frac{d\Gamma}{4\pi\Delta R} \Upsilon^n(\eta, \theta_j). \quad (16)$$

By changing the integration variable to  $\theta^* = \theta - \theta_j$  and performing the integration, the near vortex filament shape factor  $\Upsilon^n$  has a closed form solution

$$\begin{aligned}
 \Upsilon^n(\eta, \theta_j) &= \int_{-\theta_j}^{\pi-\theta_j} \frac{\eta(1-\eta)\cos(\theta^*)-\eta(1-\eta)^2}{\left(1+(1-\eta)^2-2(1-\eta)\cos(\theta^*)\right)^{\frac{3}{2}}} d\theta^* = \\
 &= -\left[ \frac{\eta}{|\eta|} \left( \frac{\eta}{(\eta-2)} E\left(\frac{\theta^*}{2} \middle| m\right) + F\left(\frac{\theta^*}{2} \middle| m\right) \right) - \frac{\eta-1}{\eta-2} \frac{2\sin(\theta^*)}{\sqrt{\eta^2+2(\eta-1)(\cos\theta^*-1)}} \right]_{-\theta_j}^{\pi-\theta_j}, \quad (17)
 \end{aligned}$$

where  $F\left(\frac{\theta^*}{2} \middle| m\right)$  is the incomplete elliptic integral of the first kind and  $E\left(\frac{\theta^*}{2} \middle| m\right)$  is the incomplete elliptic integral of the second kind with  $m = 4\frac{(\eta-1)}{\eta^2}$ . As  $\theta_j$  is assumed to be small throughout all this work, Eq. (17) can be linearized with respect



to  $\theta_j$

$$\Upsilon^n(\eta, \theta_j) \approx -\frac{\eta}{|\eta|} \left( \frac{\eta}{(\eta-2)} E\left(\frac{\pi}{2} \middle| m\right) + F\left(\frac{\pi}{2} \middle| m\right) \right) + \frac{\eta-1}{\eta-2} \frac{2\theta_j}{\sqrt{\eta^2 - (\eta-1)\theta_j^2}}, \quad (18)$$

where  $F\left(\frac{\pi}{2} \middle| m\right)$  and  $E\left(\frac{\pi}{2} \middle| m\right)$  are the complete elliptic integral of the first and second kind respectively. Eq. (18) can be linearized with respect to  $\eta$ , as its values for AWESs are expected to be small. Therefore,  $\Upsilon^n$  becomes

$$185 \quad \Upsilon^n(\eta, \theta_j) \approx 1 - \eta \left( 1 - \frac{1}{4} \ln(\eta^2) \right) + \frac{\eta-1}{\eta-2} \frac{2\theta_j}{\sqrt{\eta^2 - (\eta-1)\theta_j^2}}. \quad (19)$$

Figure 4 shows the trend of  $\Upsilon^n$  obtained with Eq. (17) (solid lines) and with the linearized version (Eq. 19) (dashed lines). The near vortex filament shape factor  $\Upsilon^n$  can be interpreted as a corrective factor to **the straight vortex filament** solution due to

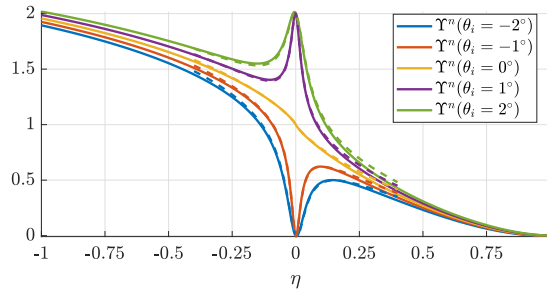

**Figure 4.** Near vortex filament shape factor  $\Upsilon^n$  as function of  $\eta$  and  $\theta_j$  for the complete solution (solid lines) and with the linearized version (dashed lines).

the filament curvature. If the evaluation point is in the same radial direction of the vortex filament origin (i.e. for  $\theta_j = 0$ ), the following regions of  $\eta$  can be analyzed:

190  $\eta \rightarrow 1$  is obtained for  $R_j \gg R_f$  and  $\Upsilon^n \rightarrow 0$ , meaning that no velocities are induced.

$\eta > 0$  is obtained for  $R_j > R_f$  and  $\Upsilon^n < 1$ , meaning that less velocities are induced compared to the straight wake case.

$\eta \rightarrow 0$  is obtained for  $R_j \approx R_f$  or ( $R_j \rightarrow \infty, R_f \rightarrow \infty$ ) and  $\Upsilon^n \rightarrow 1$ , meaning that the wake curvature is negligible and the solution coincides with the straight wake case.

$\eta < 0$  is obtained for  $R_j < R_f$  and  $\Upsilon^n > 1$ , meaning that more velocities are induced compared to the straight wake case.

195  $\rightarrow -\infty$  is obtained for  $R_j \ll R_f$ , and  $\Upsilon^n \rightarrow \pi$ , as the evaluation point is close to the center of the half circle.

If the evaluation point is not in the same radial direction of the vortex filament origin (i.e. for  $\theta_j \neq 0$ ), the solution tends to  $\Upsilon^n(\theta_j = 0)$  when  $\eta \rightarrow 1$  or  $\eta \rightarrow -\infty$  because the evaluation point is far from the filament, so the effect of  $\theta_j$  vanishes. For  $\theta_j > 0$ , the evaluation point is downstream the filament origin (see Fig. 2a) and  $\Upsilon^n \rightarrow 2$  when  $\eta \rightarrow 0$ , meaning that twice the velocities induced by the semi-infinite straight filament (equivalent to one infinite straight filament) are found. For  $\theta_j < 0$ , the evaluation point is upstream the filament origin and  $\Upsilon^n \rightarrow 0$  when  $\eta \rightarrow 0$ , meaning that no velocities are induced.



### 3.2 Circulation trailed by an elliptic wing

Straight elliptical wings in forward flight have minimum induced drag and therefore are here chosen to analyze the near wake. To express the ratio between the wing coordinate  $y_j = R_j - R_0$  and the turning radius  $R_0$ , the parameters  $\eta_j$  is introduced

$$\eta_j = \frac{y_j}{R_0} = \frac{R_j - R_0}{R_0}, \quad (20)$$

205 which at the outer wing tip  $y_j = b/2$  takes the value  $\kappa_0$

$$\kappa_0 = \frac{b/2}{R_0}, \quad (21)$$

which is named inverse turning ratio in this work.

The position of the trailed vorticity  $y_f = R_f - R_0$  is defined through the angular position  $\alpha$

$$\cos(\alpha) = \frac{y_f}{b/2} = -\frac{\eta_0}{\kappa_0}, \quad (22)$$

210 with  $\eta_0$  defined in Eq. (3). The aerodynamic lift per unit length at the location of the trailed vorticity on the wing can be computed with the Kutta–Joukowski relation

$$l(y_f) = \rho u \Gamma, \quad (23)$$

where  $\rho$  is the air density,  $u(y_f) \approx u_0 \frac{R_0 + y_f}{R_0} = u_0(1 - \eta_0)$  the local velocity and  $\Gamma(y_f)$  the bound circulation. As lift (Eq. 23) on the main wing needs to be distributed to prevent roll moments, the bound circulation can be taken to set loads to be symmetric  
 215 along the wing span

$$\Gamma = \frac{\Gamma^E}{1 - \eta_0} \approx \Gamma^E (1 - \kappa_0 \cos \alpha), \quad (24)$$

where  $\Gamma^E$  is the circulation the wing would have in a straight motion and Eq. (22) is used with the assumption of  $\kappa_0$  small. Note that loads are typically distributed along the wing span by means of ailerons, which create discontinuities in the lift distribution. The lift distribution is modelled here to be a continuous function for simplicity. The circulation the wing would have in forward  
 220 flight  $\Gamma^E$  is

$$\Gamma^E = \Gamma_0 \sin(\alpha) = 2b \frac{u_0 C_L}{\pi \mathcal{R}} \sin(\alpha) = 2b w_{\parallel} \sin(\alpha), \quad (25)$$

where  $C_L$  is the wing lift coefficient,  $\mathcal{R}$  is the wing aspect ratio and  $w_{\parallel}$  the induced velocity the same wing would have in forward flight.

The trailed vorticity, according to Helmholtz' law, is the derivative of the bound vorticity with respect to the wing span  
 225 coordinate

$$\gamma = \frac{d\Gamma}{dy_f} = \Gamma_0 \left( \cos(\alpha) + \kappa_0 (1 - 2 \cos(\alpha)^2) \right) \frac{d\alpha}{dy_f}. \quad (26)$$



### 3.3 Velocities induced on the lifting line

The axial induced velocity  $w_j^n$  at a given point  $p_j$  along the lifting line ( $\theta_j = 0$ ) due to the near wake is found by integrating the effects of the trailed vorticity  $\gamma$  along the wing span

$$230 \quad w_j^n = -\frac{1}{4\pi} \int_{-b/2}^{b/2} \frac{\gamma}{\Delta R} \Upsilon^n(\eta, \theta_j = 0) dy_f. \quad (27)$$

The induced velocities on the lifting line can be found numerically and fitted between  $y_j = -b/2$  and  $y_j = b/2$ . The induced velocity at a point on the lifting line given by the near wake is

$$w^n(\eta_j) = w_{\parallel} \left( 1 - \frac{3}{2}\eta_j - \eta_j^2 + \frac{\kappa_0^2}{4} \right). \quad (28)$$

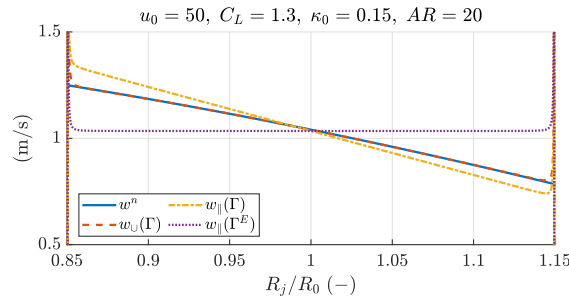

**Figure 5.** Induced velocities computed analytically  $w^n$  (Eq. 28) and numerically with curved wake (Eq. 19 is used) and no-roll circulation  $w_{\perp}(\Gamma)$ , with straight wake and no-roll circulation  $w_{\parallel}(\Gamma)$  and with straight wake and symmetric circulation  $w_{\parallel}(\Gamma^E)$ .

In Fig. 5, a comparison of the analytic approximation (Eq. 28) with the solutions obtained numerically is shown. The induction computed with straight vortex filaments or with the near vortex filaments are almost equivalent. This suggests that the development of lifting-line methods assuming straight trailed vortex filaments for time simulators (e.g. Damiani et al. (2019)) or for flight dynamics analyses (e.g. Trevisi et al. (2021a)) are a **good approximation of the near wake**.

The induced change in angle of attack for the local profile is

$$240 \quad \alpha_i^n(\eta_j) = \frac{w^n(\eta_j)}{u(\eta_j)} = \frac{C_L}{\pi AR} \frac{1}{1 + \eta_j} \left( 1 - \frac{3}{2}\eta_j - \eta_j^2 + \frac{\kappa_0^2}{4} \right). \quad (29)$$

Finally, the wing drag coefficient can be found by integrating the projection of the local lift coefficient along the velocity direction

$$C_{Di}^n \approx \frac{C_L}{\pi AR} \left( 1 + \frac{\kappa_0^2}{4} - \frac{3}{2}\kappa_0^3 \right) \approx \frac{C_L^2}{\pi AR}, \quad (30)$$

where  $\kappa_0$  is assumed to be small. The induced drag of an elliptical wing, due to the near wake, is then found to be similar to the induced drag of the same wing in forward flight. The glide ratio related to the near wake drag coefficient is

$$245 \quad G^n = \frac{C_L}{C_{Di}^n} \approx \frac{\pi AR}{C_L}. \quad (31)$$

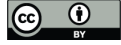

#### 4 Far wake model

In Sect. 2, the axial induced velocity produced by a helical vortex filament is modelled as half a vortex ring plus a semi-infinite vortex ring cascade, as in Fig. 2b. In Sect. 3, a near wake model is built based on this idealization, while in this section a far wake model is developed.

250 This section is organized as follows: In Sect. 4.1, an approximation of the velocities induced by two semi-infinite vortex ring cascades with opposite intensity is given as function of their radial and axial distance. In Sect. 4.2, a drag coefficient modelling the far wake for an elliptic wing is found. In Sect. 4.3 an explicit closure model and in Sect. 4.4 an implicit closure model to find the vortex rings axial distance are introduced.

##### 4.1 Velocity induced by the far wake

255 In the far wake, the wake is assumed to be already rolled up into **two separate vortices**. The velocities induced by the far wake are assumed to be constant over the wing span, therefore they are evaluated at the wing center  $R_j = R_0$ . The velocity induced by the cascade of vortex rings of intensity  $\Gamma$  on the wing center is

$$w^f \approx -\frac{\Gamma}{4\pi\Delta R} \sum_{k=1}^{\infty} \int_{-\pi}^{\pi} \underbrace{\frac{\eta_0(1-\eta_0)\cos(\theta) - \eta_0(1-\eta_0)^2}{\left(1 - 2(1-\eta_0)\cos(\theta) + (1-\eta_0)^2 + \left(\frac{2\pi k}{\lambda_0}\right)^2\right)^{3/2}}}_{\Upsilon_{z,k}^f} d\theta, \quad (32)$$

where  $\phi_j$  in Eq. (15) is neglected. The integral has a **closed form solution**, so  $\Upsilon_{z,k}^f$  takes the form

$$260 \quad \Upsilon_{z,k}^f(\eta_0, \lambda_0) = \frac{-2\eta_0}{\left(\eta_0^2 + \left(\frac{2\pi k}{\lambda_0}\right)^2\right)^{1/2}} \left( F(m) + \frac{\eta_0(\eta_0 - 2) - \left(\frac{2\pi k}{\lambda_0}\right)^2}{(\eta_0 - 2)^2 + \left(\frac{2\pi k}{\lambda_0}\right)^2} E(m) \right), \quad (33)$$

with  $m = \frac{4(\eta_0 - 1)}{\eta_0^2 + \left(\frac{2\pi k}{\lambda_0}\right)^2}$ .

The outer and inner trailed vortexes are assumed to be located at  $R_f = R_0 \pm y_v$ , such that  $\Delta R = \mp y_v$  and  $\eta_0 = \mp \eta_v = \mp \frac{y_v}{R_0}$ , with an intensity of  $\Gamma = \pm \Gamma_0$  respectively. The velocity at the wing center induced by the two vortex ring cascades is

$$w^f \approx \frac{\Gamma_0}{4\pi y_v} \left( \sum_{k=1}^{\infty} \Upsilon_{z,k}^f(\eta_0 = -\eta_v, \lambda_0) + \sum_{k=1}^{\infty} \Upsilon_{z,k}^f(\eta_0 = \eta_v, \lambda_0) \right). \quad (34)$$

265 The summation can be solved numerically for different values of  $\lambda_0$  and  $\eta_v$  and its solution fitted as function of these two parameters. The **approximated solution of the summation is**

$$\sum_{k=1}^{\infty} \left( \Upsilon_{z,k}^f(-\eta_v, \lambda_0) + \Upsilon_{z,k}^f(\eta_v, \lambda_0) \right) \approx \frac{9}{2} \eta_v^{\pi/2} \left( \frac{\lambda_0}{2\pi} \right)^{3/2}. \quad (35)$$

Figure 6 shows the comparison between the solution obtained numerically and the approximation given in Eq. (35).

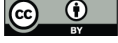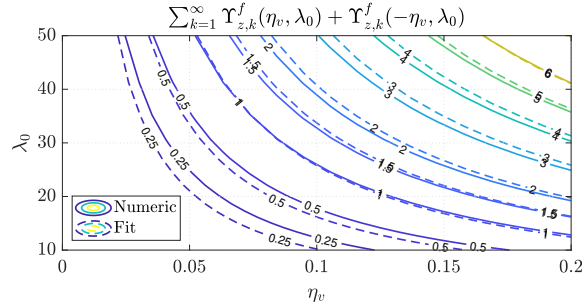

**Figure 6.** Summation modelling the far wake shape function obtained numerically (solid) and fitted function (dashed).

#### 4.2 Induced drag coefficient due to the far wake for an elliptic wing

270 For an elliptical wing, the rolled-up trailed vortices are located approximately at the center of trailed vorticity at  $y_v = \frac{\pi b}{8}$  (Gaunaa et al. (2020)) for the outer and inner wing respectively, such that their non-dimensional radial coordinate is  $\eta_v = \frac{\pi b}{8R_0} = \frac{\pi}{4} \kappa_0$ . The approximate **solution** for the induced velocity, considering  $\Gamma_0 = 2b \frac{u_0 C_L}{\pi R}$ , is

$$w^f \approx \frac{1}{4\pi} \frac{u_0 C_L}{\pi R} \kappa_0^{\pi/2} \lambda_0^{3/2}, \quad (36)$$

and the relative induced drag coefficient due to the far wake

$$275 \quad C_{Di}^f \approx \frac{1}{4\pi} \frac{C_L^2}{\pi R} \kappa_0^{\pi/2} \lambda_0^{3/2}. \quad (37)$$

The glide ratio related to the far wake drag coefficient is

$$G^f = \frac{C_L}{C_{Di}^f} \approx \frac{4\pi}{\kappa_0^{\pi/2} \lambda_0^{3/2}} \frac{\pi R}{C_L}. \quad (38)$$

As one of the final goals of this work is to model the system glide ratio  $G$  to refine a power equation by properly including the contribution from the wake, the correct drag coefficient shall include contributions from the near and far wake. The system

280 glide ratio is therefore

$$G = \frac{C_L}{C_D} = \frac{C_L}{C_{D0} + C_{Di}^n + C_{Di}^f} = \frac{1}{\frac{1}{G_0} + \frac{1}{G^n} + \frac{1}{G^f}}, \quad (39)$$

where  $C_{D0}$  is the summation of the aircraft viscous and pressure drag  $C_{D,v}$  and the equivalent tether drag  $C_{D,t} = C_{\perp} \frac{D_t L_t}{4A}$ , where  $C_{\perp}$  is the drag coefficient of the tether section,  $D_t$  and  $L_t$  the tether diameter and length and  $A$  the main wing area (Trevisi et al. (2020a)).

285 The system glide ratio can be then seen as the sum of  $G_0$ ,  $G^n$  and  $G^f$  connected in parallel (as resistors connected in parallel in an electric circuit)

$$G = G_0 \parallel G^n \parallel G^f = \frac{1}{\frac{1}{G_0} + \frac{C_L}{\pi R} + \frac{1}{4\pi} \frac{C_L}{\pi R} \kappa_0^{\pi/2} \lambda_0^{3/2}}. \quad (40)$$



Equation (40) models the system glide ratio of an AWES with elliptic wing under the assumption of no wake expansion for a generic normalized torsional parameter  $\lambda_0$ . A closure model is then necessary to link  $\lambda_0$  with the other aerodynamic and geometric parameters of the model. Two closure models are proposed in the following two sections.

### 4.3 Explicit closure model for the normalized torsional parameter

The first closure model assumes that the axial velocity of the vortex filaments is equal to the axial velocity at the AWES. The axial velocity of the vortex filaments is assumed to be  $v_r(1 - a_z)$ , where  $a_z$  is the axial induction at the AWES wing center. The helix pitch  $h_0$  can be approximated with the distance covered by the vortex filaments moving downwind in the revolution period. The revolution period is the ratio between the circumference length and the AWES mid-span tangential velocity  $\frac{2\pi R_0}{u_0}$

$$h_0 = v_r(1 - a_z) \frac{2\pi R_0}{u_0} = \frac{2\pi R_0}{\lambda} (1 - a_z), \quad (41)$$

where  $\lambda = \frac{u_0}{v_r}$  is the wing speed ratio.

Considering the definition of the normalized torsional parameter  $\lambda_0 = \frac{2\pi R_0}{h_0}$  (Eq 6),  $\lambda_0$  can be linked to the the wing speed ratio  $\lambda$  as

$$\lambda_0 = \frac{\lambda}{(1 - a_z)}. \quad (42)$$

The axial induction is the sum of the near wake and the far wake induced velocities, normalized with the relative wind speed

$$a_z = \frac{w_0^n + w^f}{v_r} = \lambda \frac{C_L}{\pi \mathcal{R}} \left( 1 + \frac{1}{4\pi} \kappa_0^{\pi/2} \lambda_0^{3/2} \right). \quad (43)$$

By considering the axial induction  $a_z$  into Eq. (42), the wing speed ratio  $\lambda$  is

$$\lambda = \lambda_0 \left( 1 - \lambda \frac{C_L}{\pi \mathcal{R}} \left( 1 + \frac{1}{4\pi} \kappa_0^{\pi/2} \lambda_0^{3/2} \right) \right), \quad (44)$$

which can be re-written as

$$\lambda = \frac{1}{\frac{1}{\lambda_0} + \frac{C_L}{\pi \mathcal{R}} + \frac{1}{4\pi} \frac{C_L}{\pi \mathcal{R}} \kappa_0^{\pi/2} \lambda_0^{3/2}}. \quad (45)$$

This equation links  $\lambda$  (wing speed ratio) to  $\lambda_0$  (non dimensional torsional parameter of the helicoidal wake), to the induced change in angle of attack produced by the near wake  $\frac{C_L}{\pi \mathcal{R}}$  and by the far wake  $\frac{1}{4\pi} \frac{C_L}{\pi \mathcal{R}} \kappa_0^{\pi/2} \lambda_0^{3/2}$ .

For AWES flying crosswind in steady state the propulsive lift is balanced by the drag, such that the force balance along the AWES longitudinal direction is null. The glide ratio  $G$  is then equal to the wing speed ratio  $\lambda$  (Fig. 7a). By setting equal Eqs. (40) and (45),  $G_0$  is found to be equal to  $\lambda_0$ . This means that the non dimensional torsional parameter of the helicoidal wake  $\lambda_0$  is equal to the glide ratio related to the constant drag term  $G_0$ . A graphical representation of this equality is given in Fig. 7b.  $\lambda_0$  is the ratio between the AWES longitudinal velocity and the wind velocity reduced by the induced velocities at the AWES (Eq. 42). If the induced velocities due to near and far wake are subtracted to the incoming wind, the induced drag related to



near and far wake should not be considered in the drag evaluation. Therefore, the only remaining drag term is related to the drag at zero lift. For the AWES to be in equilibrium along the longitudinal direction,  $\lambda_0$  needs to be equal to  $G_0$ . Note that the two sketches in Fig. 7 show the same physics. In Fig. 7a the effect of the induced velocities is taken into account by including induced drag terms, as typically done for flying wings. In Fig. 7b the effect of the induced velocities is taken into account by reducing the incoming wind, as typically done for wind turbines. The resultant longitudinal velocity  $u_0$  is equal for the two sketches.

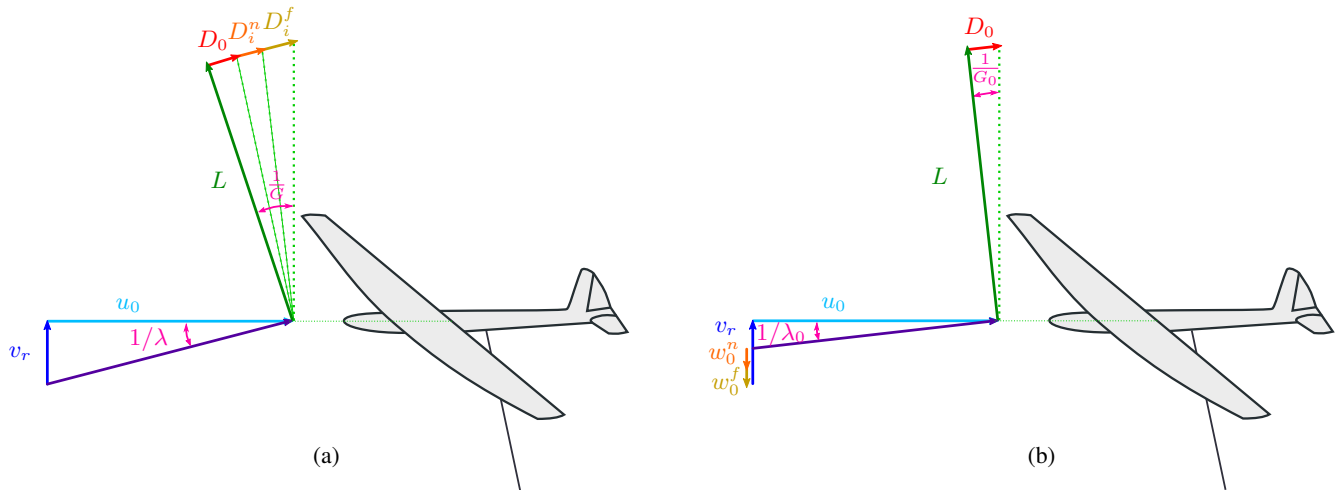

**Figure 7.** Velocity triangles and force balance if the effect of the induced velocities is taken into account by including induced drag terms **(a)** and if the effect of the induced velocities is taken into account by reducing the incoming wind **(b)**.

The system glide ratio (Eq. 40) can then be formulated by considering  $\lambda_0 = G_0$ , leading to a new definition

$$G = \frac{1}{\frac{1}{G_0} + \frac{C_L}{\pi AR} + \frac{1}{4\pi} \frac{C_L}{\pi AR} \kappa_0^{\pi/2} G_0^{3/2}} \quad (46)$$

The system glide ratio is now dependent also on the flight trajectory radius through the inverse turning ratio  $\kappa_0$ . For large turning radius (i.e. small  $\kappa_0$ ) the contribution from the far wake vanishes and Eq. (46) coincides with the glide ratio expression for the same wing in straight motion.

Figure 8 shows the ratio between the far and near wake induced drag with respect to the near wake contribution (i.e. the expression  $\frac{1}{4\pi} \kappa_0^{\pi/2} G_0^{3/2}$ ). AWES designs tend to have high values of  $G_0$ , obtained by minimizing  $C_{D0}$  and operating at high lift coefficient  $C_L$ , and to have large  $\kappa_0$  (i.e. small turning radius  $R_0$ ). Small turning radii minimise the vertical height of the trajectory and therefore reduce the potential energy exchange over the loop, reducing power losses (Trevisi et al. (2022a)). The induction of far wake is however penalizing solutions with high  $G_0$  and high  $\kappa_0$ , highlighting the need of a trade-off between different disciplines in the design. These considerations, among others, justify the development of the multidisciplinary design, analysis and optimization framework T-GliDe (Trevisi et al. (2022b)).

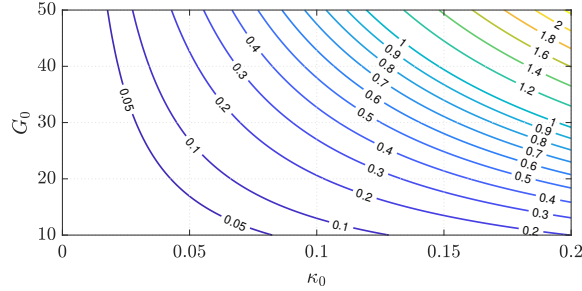

**Figure 8.** Ratio between the far and near wake induced drag as function of the glide ratio related to  $C_{D0}$  and the inverse turning ratio  $\kappa_0$ .

In Sect. 5, a comparison between the results produced by this closure model and by a lifting line free vortex wake method, implemented in QBlade, is performed. Unfortunately, the comparison does not show a satisfactory agreement between the two methods for high loading cases. Therefore, an implicit closure model is proposed in the next section.

#### 4.4 Implicit closure model for the normalized torsional parameter

The second proposed closure model for the normalized torsional parameter estimates the wake velocity by considering the axial and the radial induced velocities at the AWES. As vortex filaments move along iso-velocity lines in the fluid, their velocity in the far wake should be equal in modulus to their velocity when they are trailed (i.e. at the AWES). The velocity at the AWES is composed by the axial velocity  $v_r(1 - a_z)$  and by the radial velocity  $v_r a_r$ . Note that the radial velocity is only due to velocities induced from the far wake. The helix pitch  $h_0$  can then be found by considering that the axial velocity of the far wake is  $v_r \sqrt{(1 - a_z)^2 + a_r^2}$

$$h_0 = v_r \sqrt{(1 - a_z)^2 + a_r^2} \frac{2\pi R_0}{u_0} = \frac{2\pi R_0}{\lambda} \sqrt{(1 - a_z)^2 + a_r^2}. \quad (47)$$

The normalized torsional parameter can then be written as

$$\lambda_0 = \frac{\lambda}{\sqrt{(1 - a_z)^2 + a_r^2}}, \quad (48)$$

where  $a_z$  is given in Eq. (43) and  $a_r$  for an elliptic wing can be approximated as (see Appendix A for the derivation)

$$a_r \approx \lambda \frac{2}{9\pi} \frac{C_L}{\pi \bar{R}} \kappa_0^{\pi/2} \lambda_0^{1.1}. \quad (49)$$

The normalized torsional parameter (Eq. 48) can be found iteratively by considering the axial (Eq. 43) and the radial (Eq. 49) induction and the definition of the glide ratio (Eq. 40), which is equal to the wing speed ratio  $G = \lambda$  when the AWES is in equilibrium.

The estimation of radial induced velocities is important not only to compute the axial velocity of the far wake, but also for the AWES aerodynamic forces and moments estimation. In the case of a straight wing with the wing span aligned with the





radial direction (as in this paper), the radial induced velocities do not generate any aerodynamic force on the wing, as they are aligned with the span. On the contrary, the radial induced velocities generate aerodynamic forces and moments in the case of a straight wing with the span not aligned with the radial direction (i.e. the AWES is yawed or rolled) or in the case of a wing characterized by dihedral and/or sweep angle. Moreover, the radial induced velocities are also influencing the angle of attack of the vertical stabilizer.

## 5 Comparison with a lifting line free vortex wake method

To validate the newly introduced aerodynamic model, a comparison with an higher fidelity code is needed. The code QBlade is chosen for the comparison, as it uses a thoroughly validated lifting line free vortex wake method (Marten et al. (2015)) for the aerodynamic modelling of conventional wind turbines. The wake is modelled explicitly with Lagrangian vortex elements, resulting in a fully resolved velocity distribution around the AWES. This, to the best of the authors' knowledge, is the first time that a free vortex wake method is used to study the entire aerodynamic wake of AWESs.

### 5.1 Lifting line free vortex wake setup

As QBlade is being used to validate the new model, the free vortex wake model is idealized accordingly. The airfoils are described by idealized polars with constant drag coefficient as function of the angle of attack ( $C_{D0}$ ) and a constant slope of the lift coefficient with respect to the angle of attack  $C_{l,\alpha} = 2\pi$ . The AWES is modelled as a horizontal axis wind turbine with one blade and no tower. The hub radius of the wind turbine is set to be equal to the inner wing tip radial position. The elliptical wing is then defined in the blade definition. Large structural rigidity is given to avoid aeroelastic phenomena. Gravity is set to zero to look for steady results. The wing is discretized with 20 aerodynamic panels. For a given setup ( $C_{D0}$ ,  $\kappa_0$ ,  $\mathcal{R}$ ), different lift coefficients can be obtained by pitching the wing. The wing is free to move on the circular trajectory, so that its velocity is determined by the force equilibrium along the motion direction. Once quantities reach a constant value as function of time, the wing speed ratio, which is equal to the glide ratio, is estimated from the rotational speed. The wing lift coefficient is obtained by knowing the thrust force produced and the rotational speed.

In Fig. 9, the wake shown in the graphic interface of QBlade is reported for a case with  $\mathcal{R} = 20$ ,  $\kappa_0 = 0.15$ ,  $C_{D0} = 0.05$  and  $0^\circ$  of pitch, which leads to  $C_L = 0.55$ . A plane, defined by the AWES position and wake center, is used to visualize the axial velocity.

### 5.2 Comparison of wake normalized torsional parameter

The first comparison concerns the downstream position of the vortices. The helix pitch can be found with  $h_0 = \frac{2\pi R_0}{\lambda_0}$  (Eq. 6), where  $\lambda_0$  is the normalized torsional parameter. In this paper, an explicit (Sect. 4.3) and an implicit (Sect. 4.4) closure models for the normalized torsional parameter are proposed.

Figures 10 and 11 show the downstream vortices position, obtained by taking the curl of the velocity field, in the plane containing the AWES (see Fig. 9 for the plane illustration) for a setup with  $\mathcal{R} = 20$ ,  $\kappa_0 = 0.15$  and  $C_{D0} = 0.05$ . Figure 10

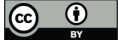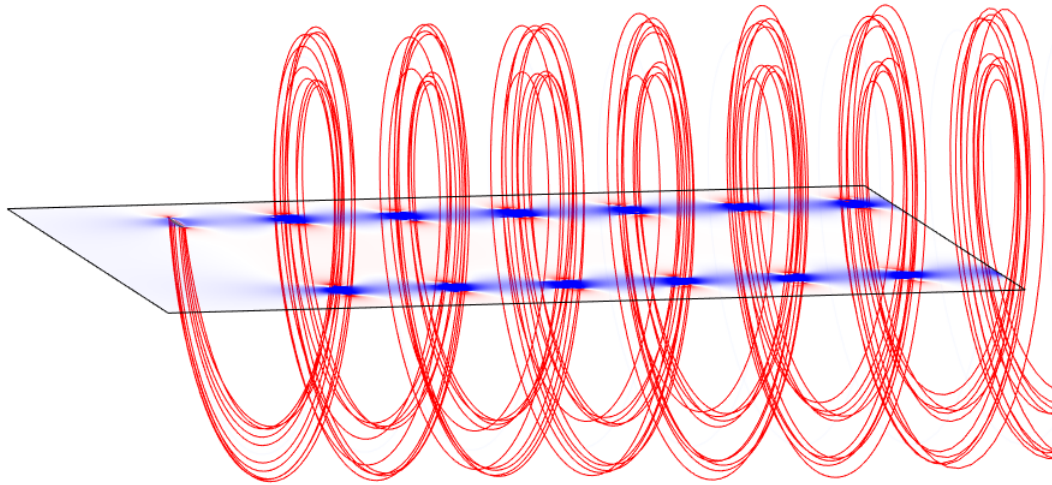

**Figure 9.** Wake shown in the graphic interface of QBlade for a case with  $\mathcal{R} = 20$ ,  $\kappa_0 = 0.15$ ,  $C_{D0} = 0.05$  and  $C_L = 0.55$ .

385 shows a low loading case with  $C_L = 0.55$ , while Fig. 10 a high loading case with  $C_L = 1.3$ . The blue vertical lines highlight the downstream position of the vortices predicted by the explicit model, while the black line by the implicit model. The red dotted lines highlight the radial position of the vortices assumed by the analytical model. For the low loading case, both models predict accurately the vortices position. For the high loading case, the implicit model outperforms greatly the explicit model, showing that the radial induced velocity at the AWES contributes significantly to the far wake velocity. In the high loading case, the wake expands slightly due to the radial induced velocities. The wake expansion is neglected in the analytical modelling.

390

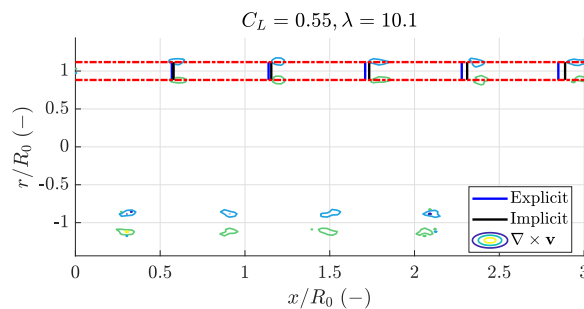

**Figure 10.** Downstream vortices position for a case with  $\mathcal{R} = 20$ ,  $\kappa_0 = 0.15$  and  $C_{D0} = 0.05$  in a low loading case with  $C_L = 0.55$  and  $\lambda = 10.1$ .

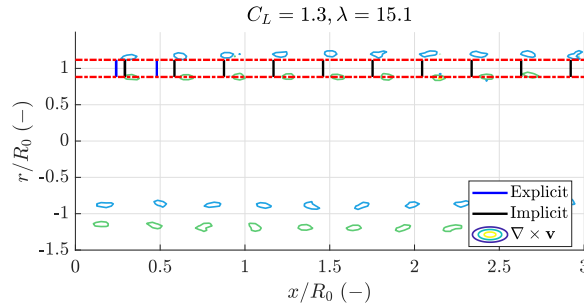

**Figure 11.** Downstream vortices position for a case with  $R = 20$ ,  $\kappa_0 = 0.15$  and  $C_{D0} = 0.05$  in a high loading case with  $C_L = 1.3$  and  $\lambda = 15.1$ . Only the position the first two vortices predicted by the explicit model is shown for clarity.

### 5.3 Comparison of axial induced velocities

In this section, the axial induced velocities computed with the analytical model just introduced and the implicit closure model are compared with the results of QBlade and two literature models related to the far wake. The high loading case introduced in the previous section ( $R = 20$ ,  $\kappa_0 = 0.15$ ,  $C_{D0} = 0.05$  and  $C_L = 1.3$ ) is here used to show the results.

395 The bound circulation  $\Gamma$  is retrieved from QBlade and the trailed vorticity  $\gamma$  can be obtained by differentiating the bound vorticity with respect to the spanwise coordinate. The induced velocities due to the near wake  $w^n$  can then be found by integrating Eq. (27) numerically. The induced velocities due to the far wake  $w^f$  are computed with Eq. (36).

The first model from literature is the far wake model by Gaunaa et al. (2020)

$$w_G^f = \frac{u_0 C_L}{\pi R} \frac{\kappa_0^2 G^2}{24 \left(1 - \frac{4GC_L}{\pi^3 R}\right)^2}, \quad (50)$$

400 where  $C_L$  is taken from QBlade and  $G$  is found iteratively. This model is coupled to the near wake model introduced in this paper, as the near wake model from Gaunaa et al. (2020) is tuned with CFD results and does not agree with the proposed near wake model.

The second model from literature, used to estimate the induction  $a_{m.}^f$ , is the momentum based model by Kheiri et al. (2018)

$$\frac{a_{m.}^f}{1 - a_{m.}^f} = \frac{\kappa_0}{4} \frac{C_L}{\pi R} \left( \frac{C_L}{C_{D,k}} \right)^2, \quad (51)$$

405 where  $C_{D,k} = C_{D0} + \frac{C_L^2}{\pi R}$  and  $C_L$  is taken from QBlade. Also this model is coupled to the near wake model introduced in this paper, such that  $a_{m.}^f$  can be seen as the induction applied to the 3D polars of the AWES.

Figure 12 shows the induction at the lifting line computed with QBlade, with the present model and with two models from literature. The momentum based model overestimates the induced velocities because a part of the wake is counted twice if the AWES is described by 3D polars, as explained by Gaunaa et al. (2020). The proposed model and the far wake from Gaunaa et al. (2020) coupled to the proposed near wake model accurately predict the induction at the lifting line.

410

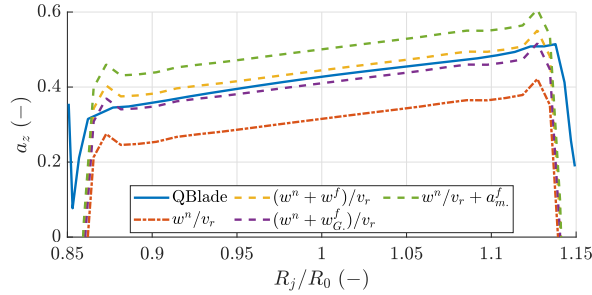

**Figure 12.** Axial induction at the lifting line obtained with QBlade (solid blue line), with the near wake model introduced in this work  $w^n/v_r$ , coupled to the far wake model introduced here  $(w^n + w^f)/v_r$ ; to the far wake model from Gaunaa et al. (2020)  $(w^n + w_{G'}^f)/v_r$  and to the momentum based model  $w^n/v_r + a_m^f$ .

#### 5.4 Comparison of radial induced velocities

In this section, the radial induced velocities computed with the analytical model (Eq. 49) are compared with the results of QBlade. Figure 13 shows the radial velocities for the high loading case ( $\lambda R = 20$ ,  $\kappa_0 = 0.15$ ,  $C_{D0} = 0.05$  and  $C_L = 1.3$ ). A good agreement between the QBlade output and the analytic solution is found.

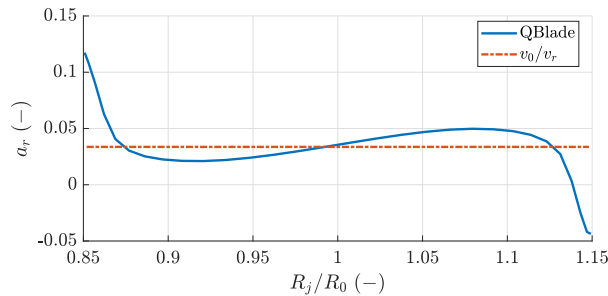

**Figure 13.** Radial induction at the lifting line obtained with QBlade (solid blue line) and with the analytic model (red dash-dotted line).

#### 415 5.5 Comparison of axial induced velocities at the AWES tail

In this section, the axial induced velocities in the symmetry plane of the AWES predicted with the proposed model and with a literature analytical model are compared with the results from QBlade.

The induced velocity in the symmetry plane of the AWES due to the trailed vorticity in the near wake can be found as function of  $\theta_j$  with

$$420 \quad w_j^n(\eta = \eta_0, \theta_j) = -\frac{1}{4\pi} \int_{-b/2}^{b/2} \frac{\gamma}{\Delta R} \Upsilon^n(\eta = \eta_0, \theta_j) dy_f, \quad (52)$$



where  $\gamma$  is taken from QBlade. To find the velocity field, the velocities induced by the bound vorticity  $\Gamma$  and from the far wake are considered too.

Phillips et al. (2002) study the velocities induced at the tail from a wing in forward flight. For an elliptical wing with no sweep, the induced velocities can be re-formulated as

$$425 \quad w_{i,Ph.} = w_{\parallel} \frac{8}{\pi^2} \left( 1 + \frac{\theta_j^2 + \left(\frac{\pi}{4}\kappa_0\right)^2}{\theta_j \sqrt{\theta_j^2 + \left(\frac{\pi}{4}\kappa_0\right)^2}} \right). \quad (53)$$

As the velocities induced by the near wake are similar to the velocities induced by the wing in forward flight, the contribution from the far wake is added to this expression.

In Fig. 14, the induced change in angle of attack found in QBlade is compared with the two solutions for the high loading case ( $\mathcal{R} = 20$ ,  $\kappa_0 = 0.15$ ,  $C_{D0} = 0.05$  and  $C_L = 1.3$ ). The proposed model is in good agreement with QBlade and the model  
 430 by Phillips et al. (2002) can still capture the main trend. These models can then be used to size the horizontal stabilizer.

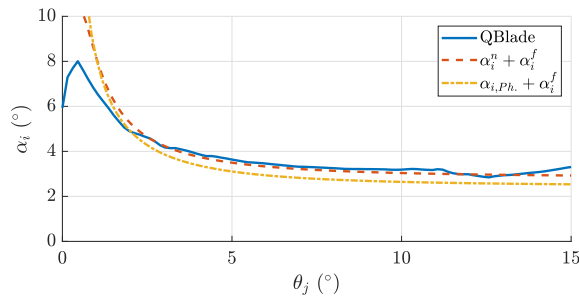

**Figure 14.** Induced change in angle of attack from QBlade (solid blue line) compared with the proposed model (red dashed line) and the analytical solution from Phillips et al. (2002) (yellow dash-dotted line) for a wing in forward flight.

## 5.6 Comparison of glide ratios

The estimation of the system glide ratio is crucial for power production estimation. Figure 15 shows the glide ratio as function of the lift coefficient for a case with  $\mathcal{R} = 20$ ,  $\kappa_0 = 0.15$  and  $C_{D0} = 0.05$  computed considering straight wakes ( $G_0 \parallel G^n$ ), the explicit model ( $G_0 \parallel G^n \parallel G_{expl}^f$ , Eq. 46), the implicit model ( $G_0 \parallel G^n \parallel G_{impl}^f$ , Sect. 4.4) and the far wake model from  
 435 Gaunaa et al. (2020) coupled to the proposed near wake ( $G_0 \parallel G^n \parallel G_G^f$ ). The squares are the solutions obtained with QBlade. The explicit closure model results in conservative glide ratio estimation for high loading, as it predicts the helix pitch to be smaller than what found in QBlade. Using the implicit closure model and the model from Gaunaa et al. (2020) for the far wake results in accurate prediction of the results of QBlade.

In Appendix B, more validation cases are reported. Generally, the implicit closure model results in an underestimation of  
 440 QBlade glide ratios estimation, while the model from Gaunaa et al. (2020) is an overestimation. The two methods are in accord and have the same computational cost.

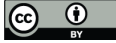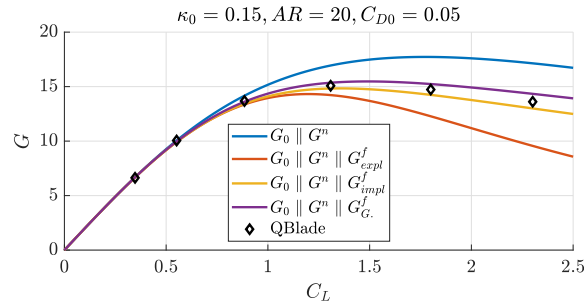

**Figure 15.** Glide ratio as function of the lift coefficient for a case with  $AR = 20$ ,  $\kappa_0 = 0.15$  and  $C_{D0} = 0.05$ .

## 6 Conclusions

In this work, a detailed analysis of the airborne wind energy systems (AWESs) aerodynamic wake is carried out with **vortex methods**, which allow to model the velocities induced at the AWES **in a physically consistent way**.

445 Under the assumption of steady crosswind operations and a non-expanding wake, the expression for the velocities induced at the AWES from a helicoidal vortex filament, trailed by a position on the AWES wing, is divided into an expression modelling the near vortex filament and one for the far vortex filament.

The near vortex filament is modelled as the first half rotation of the helicoidal filament, where the axial component of the filament is neglected. The velocity induced by the near vortex filament is expressed in term of elliptic integrals, and it is  
 450 linearized to a more intuitive expression. The induced drag coefficient modelling the near wake, built up from the near vortex filaments contributions, is found to be similar to the drag coefficient the same wing would have in forward flight.

The far wake is modelled as two semi-infinite vortex rings cascades with opposite intensity. The related induced velocities depend on the radial position of the rings, which is known, and on the axial distance of the rings, which is unknown. Two closure models are proposed to link the axial distance of the rings with the other physical quantities of the model. An explicit  
 455 model is derived by assuming that the vortex filaments move downstream with the axial velocity at the AWES center. An implicit model is derived by **assuming** that the far wake vortices move downstream with a velocity equal to the velocity, in modulus, at the AWES center. To find the modulus of the velocity at the wing center, the radial velocity induced ~~induced~~ by the far wake is also derived.

To validate the newly introduced model, a comparison with a lifting line free vortex wake method, implemented in QBlade,  
 460 is performed. A good agreement between the implicit model and the free vortex wake results is found.

The proposed aerodynamic model will be used to refine the power equations of Ground-Gen and Fly-Gen AWESs in an imminent work. **The model is suitable for time-marching aero-servo-dynamic-elastic simulations of AWESs. Indeed, the near wake can be modelled with lifting line methods and the far wake model can take as inputs the average values over the loop.** Moreover, the model can be used in design and optimisation studies.



## 465 Nomenclature

### Latin Symbols

|     |                      |                                                                                 |
|-----|----------------------|---------------------------------------------------------------------------------|
|     | $A$                  | Wing area                                                                       |
|     | $a_r$                | Radial induction                                                                |
|     | $a_z$                | Axial induction                                                                 |
| 470 | $\mathcal{R}$        | Wing aspect ratio                                                               |
|     | $b$                  | Wing span                                                                       |
|     | $C_D$                | System drag coefficient                                                         |
|     | $C_{D0}$             | System drag coefficient at zero lift                                            |
|     | $C_{Di}$             | Induced drag coefficient                                                        |
| 475 | $C_L$                | Wing lift coefficient                                                           |
|     | $G$                  | $C_L/C_D$ : glide ratio                                                         |
|     | $G_0$                | $C_L/C_{D0}$ : glide ratio related to the drag coefficient at zero lift         |
|     | $G^f$                | $C_L/C_{Di}^f$ : glide ratio related to the far wake drag coefficient           |
|     | $G^n$                | $C_L/C_{Di}^n$ : glide ratio related to the near wake drag coefficient          |
| 480 | $h_0$                | Helicoidal wake pitch                                                           |
|     | $p_j$                | Evaluation point                                                                |
|     | $R_0$                | Mid-span turning radius                                                         |
|     | $R_f$                | Helicoidal vortex filament radius                                               |
|     | $R_j$                | Evaluation point radius                                                         |
| 485 | $u_0$                | AWES longitudinal velocity                                                      |
|     | $v_0$                | Radial induced velocity at the wing center                                      |
|     | $v_o$                | Reel-out velocity                                                               |
|     | $v_r$                | Relative wind speed                                                             |
|     | $v_w$                | Wind speed                                                                      |
| 490 | $w$                  | Induced axial velocity                                                          |
|     | $w_0$                | Axial induced velocity at the wing center                                       |
|     | $y_f$                | $R_f - R_0$ : vortex filament span-wise position                                |
|     | $y_j$                | $R_j - R_0$ : evaluation point span-wise position                               |
|     | <b>Greek Symbols</b> |                                                                                 |
| 495 | $\alpha_i$           | Induced change in angle of attack                                               |
|     | $\Delta R$           | $R_j - R_f$                                                                     |
|     | $\eta$               | $\Delta R/R_j$                                                                  |
|     | $\eta_0$             | $-y_f/R_0$                                                                      |
|     | $\eta_j$             | $y_j/R_0$                                                                       |
| 500 | $\Gamma$             | Bound vorticity                                                                 |
|     | $\gamma$             | Trailed vorticity                                                               |
|     | $\Gamma_0$           | Intensity of the rolled up trailed vortices                                     |
|     | $\kappa_0$           | $b/(2R_0)$ : inverse turning ratio                                              |
|     | $\lambda$            | $u_0/v_r$ : wing speed ratio                                                    |
| 505 | $\lambda_0$          | Normalized torsional parameter of the helicoidal wake                           |
|     | $\phi_j$             | Angular position of the evaluation point $p_j$ around $e_1$ starting from $e_2$ |
|     | $\rho$               | Air density                                                                     |



- 510  $\theta$  Angular parameter of the helix  
 $\theta_j$  Angular position of the evaluation point  $\mathbf{p}_j$  around  $\mathbf{e}_3$  starting from  $\mathbf{e}_2$   
 $\Upsilon_{z,k}^f$  Shape factor modelling the axial induction produced by the  $k^{th}$  vortex ring  
 $\Upsilon^n$  Shape factor modelling the near wake axial induction  
 $\Upsilon_{r,k}$  Shape factor modelling the radial induction produced by the  $k^{th}$  vortex ring

*Code availability.* QBlade is an open source code available online at <https://qblade.org/> (TU Berlin (accessed 10 December, 2022)).

## Appendix A: Derivation of radial induction

- 515 The radial induction can be written as the radial velocity normalized with the relative wind velocity  $v_r$ .

$$a_r = \frac{v_0}{v_r}. \quad (\text{A1})$$

By using the modelling framework detailed in Sect. 2, the numerator of Biot-Savat law (Eq. 7), when looking at the velocity component along  $\mathbf{e}_2$  for a case with  $\theta_j = \phi_j = 0$ , can be written as

$$(d\mathbf{l} \times \mathbf{r}) \cdot \mathbf{e}_2 = R_j^2 (1 - \eta) (\sin(\theta) - \cos(\theta)\theta) \frac{1 - \eta}{1 - \eta_0} \frac{1}{\lambda_0} d\theta, \quad (\text{A2})$$

- 520 and the denominator is given in Eq. (12).

The induced velocities are evaluated at the wing center  $\eta = \eta_0$ , such that

$$v_0 = -\frac{\Gamma}{4\pi\Delta R} \int_0^{+\infty} \frac{\eta_0 (1 - \eta_0) (\sin(\theta) - \cos(\theta)\theta) \frac{1}{\lambda_0}}{\left(1 - 2(1 - \eta_0) \cos(\theta) + (1 - \eta_0)^2 + \left(\frac{\theta}{\lambda_0}\right)^2\right)^{\frac{3}{2}}} d\theta. \quad (\text{A3})$$

The integral, as previously done in Eq. (14), can be written as a summation of integrals and the remaining terms proportional to  $\theta$  neglected. The radial induced velocity, noting that the near wake does not contribute, is then

$$525 \quad v_0 \approx -\frac{\Gamma}{4\pi\Delta R} \sum_{k=1}^{\infty} \underbrace{\eta_0 (1 - \eta_0) \frac{2\pi k}{\lambda_0} \int_{-\pi}^{\pi} \frac{\frac{\sin(\theta)}{2\pi k} - \cos(\theta)}{\left(1 - 2(1 - \eta_0) \cos(\theta) + (1 - \eta_0)^2 + \left(\frac{2\pi k}{\lambda_0}\right)^2\right)^{\frac{3}{2}}} d\theta}_{\Upsilon_{r,k}}. \quad (\text{A4})$$

The integral has an analytic solution and the shape factor  $\Upsilon_{r,k}$  is

$$\Upsilon_{r,k} = \frac{2\eta_0 \left(\frac{2\pi k}{\lambda_0}\right)}{\left(\eta_0^2 + \left(\frac{2\pi k}{\lambda_0}\right)^2\right)^{1/2}} \left( F(m) - \frac{1 + (1 - \eta_0)^2 + \left(\frac{2\pi k}{\lambda_0}\right)^2}{(\eta_0 - 2)^2 + \left(\frac{2\pi k}{\lambda_0}\right)^2} E(m) \right). \quad (\text{A5})$$

$$\text{with } m = \frac{4(\eta_0 - 1)}{\eta_0^2 + \left(\frac{2\pi k}{\lambda_0}\right)^2}.$$





As previously done for the axial induced velocity, the outer and inner trailed vortexes are assumed to be located at  $R_f = R_0 \pm y_v$ , such that  $\Delta R = \mp y_v$  and  $\eta_0 = \mp \eta_v = \mp \frac{y_v}{R_0}$ , with an intensity of  $\Gamma = \pm \Gamma_0$  respectively. The velocity at the wing center induced by the two vortex ring cascades is

$$v_0 \approx \frac{\Gamma_0}{4\pi y_v} \left( \sum_{k=1}^{\infty} \Upsilon_{r,k}(\eta_0 = -\eta_v, \lambda_0) + \sum_{k=1}^{\infty} \Upsilon_{r,k}(\eta_0 = \eta_v, \lambda_0) \right). \quad (\text{A6})$$

The summation can be solved numerically for different values of  $\lambda_0$  and  $\eta_v$  and its solution fitted as function of these two parameters. The approximated solution of the summation is

$$\sum_{k=1}^{\infty} \Upsilon_{r,k}(\eta_0 = -\eta_v, \lambda_0) + \sum_{k=1}^{\infty} \Upsilon_{r,k}(\eta_0 = \eta_v, \lambda_0) \approx \frac{\pi}{12} \eta_v^{\pi/2} \lambda_0^{1.1}. \quad (\text{A7})$$

Figure A1 shows the comparison between the solution obtained numerically and the approximation given in Eq. A7.

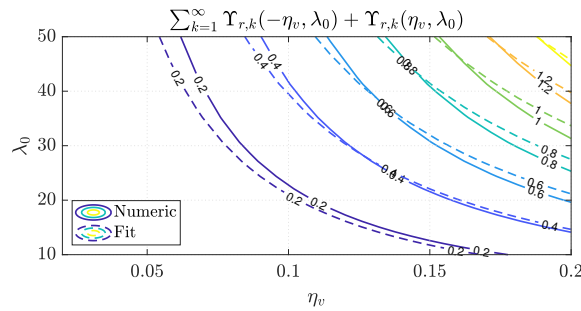

**Figure A1.** Summation modelling the far wake radial shape function obtained numerically (solid lines) and fitted function (dashed lines).

For an elliptic wing,  $\eta_v = \frac{\pi}{4} \kappa_0$  and  $\Gamma_0 = 2b \frac{u_0 C_L}{\pi A R}$ . The radial induction is then

$$a_r \approx \lambda \frac{2}{9\pi} \frac{C_L}{\pi A R} \kappa_0^{\pi/2} \lambda_0^{1.1}. \quad (\text{A8})$$

## Appendix B: Comparison of glide ratios

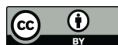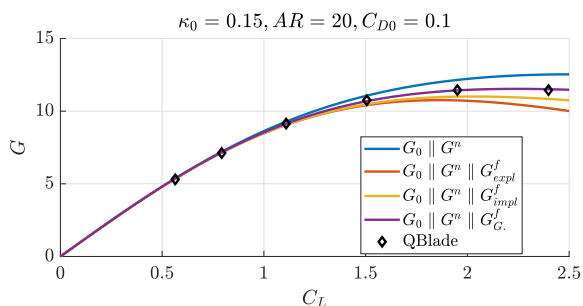

**Figure B1.** Glide ratio as function of the lift coefficient for a case with  $AR = 20$ ,  $\kappa_0 = 0.15$  and  $C_{D0} = 0.1$ .

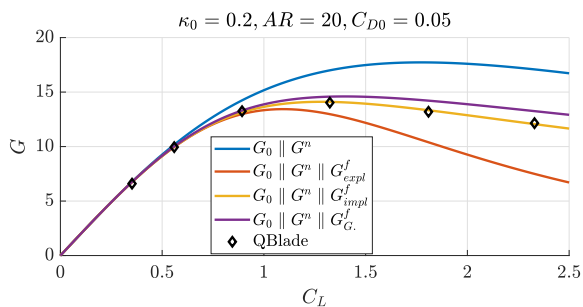

**Figure B2.** Glide ratio as function of the lift coefficient for a case with  $AR = 20$ ,  $\kappa_0 = 0.2$  and  $C_{D0} = 0.05$ .

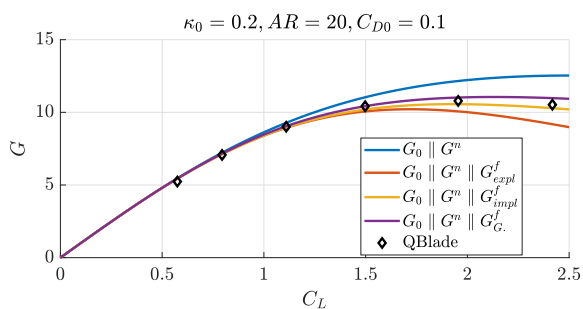

**Figure B3.** Glide ratio as function of the lift coefficient for a case with  $AR = 20$ ,  $\kappa_0 = 0.2$  and  $C_{D0} = 0.1$ .

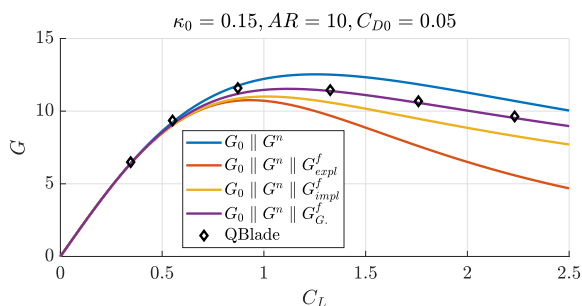

**Figure B4.** Glide ratio as function of the lift coefficient for a case with  $AR = 10$ ,  $\kappa_0 = 0.15$  and  $C_{D0} = 0.05$ .

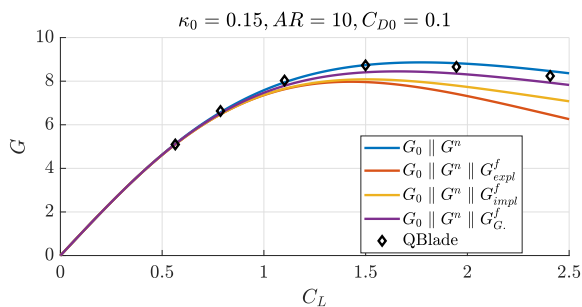

**Figure B5.** Glide ratio as function of the lift coefficient for a case with  $AR = 10$ ,  $\kappa_0 = 0.15$  and  $C_{D0} = 0.1$ .

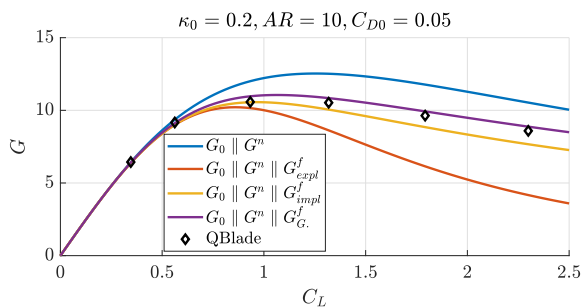

**Figure B6.** Glide ratio as function of the lift coefficient for a case with  $AR = 10$ ,  $\kappa_0 = 0.2$  and  $C_{D0} = 0.05$ .

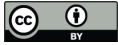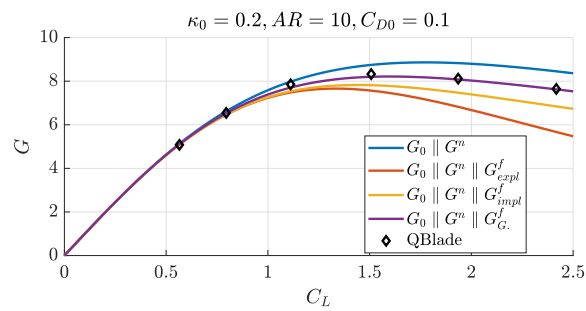

**Figure B7.** Glide ratio as function of the lift coefficient for a case with  $AR = 10$ ,  $\kappa_0 = 0.2$  and  $C_{D0} = 0.1$ .



540 *Author contributions.* FT conceptualized and developed the research methods, produced the results and wrote the draft version of the paper. AC and CEDR supported the research and reviewed the paper.

*Competing interests.* Alessandro Croce is a member of the editorial board of Wind Energy Science. The authors have no other competing interests to declare.



## References

- 545 Archer, C. L.: An Introduction to Meteorology for Airborne Wind Energy, in: Airborne Wind Energy, edited by Ahrens, U., Diehl, M., and Schmehl, R., pp. 81–94, Springer Berlin Heidelberg, [https://doi.org/10.1007/978-3-642-39965-7\\_5](https://doi.org/10.1007/978-3-642-39965-7_5), 2013.
- Bauer, F., Kennel, R. M., Hackl, C. M., Campagnolo, F., Patt, M., and Schmehl, R.: Drag power kite with very high lift coefficient, *Renewable Energy*, 118, 290–305, <https://doi.org/10.1016/j.renene.2017.10.073>, 2018.
- Branlard, E.: *Wind Turbine Aerodynamics and Vorticity-Based Methods*, Springer Cham, <https://doi.org/10.1007/978-3-319-55164-7>, 2017.
- 550 Castro-Fernández, I., Borobia-Moreno, R., Cavallaro, R., and Sánchez-Arriaga, G.: Three-Dimensional Unsteady Aerodynamic Analysis of a Rigid-Framed Delta Kite Applied to Airborne Wind Energy, *Energies*, 14, <https://doi.org/10.3390/en14238080>, 2021.
- Costello, S., Costello, C., François, G., and Bonvin, D.: Analysis of the maximum efficiency of kite-power systems, *Journal of renewable and sustainable energy*, 7, 053 108, <https://doi.org/10.1063/1.4931111>, 2015.
- Damiani, R., Wendt, F. F., Jonkman, J. M., and Sicard, J.: A Vortex Step Method for Nonlinear Airfoil Polar Data as Implemented in  
555 KiteAeroDyn, in: AIAA Scitech 2019 Forum, <https://doi.org/10.2514/6.2019-0804>, 2019.
- De Lellis, M., Reginatto, R., Saraiva, R., and Trofino, A.: The Betz limit applied to Airborne Wind Energy, *Renewable Energy*, 127, 32–40, <https://doi.org/10.1016/j.renene.2018.04.034>, 2018.
- Gaunaa, M., Forsting, A. M., and Trevisi, F.: An engineering model for the induction of crosswind kite power systems, *Journal of Physics: Conference Series*, 1618, 032 010, <https://doi.org/10.1088/1742-6596/1618/3/032010>, 2020.
- 560 Haas, T. and Meyers, J.: Comparison study between wind turbine and power kite wakes, *Journal of Physics: Conference Series*, 854, 012 019, <https://doi.org/10.1088/1742-6596/854/1/012019>, 2017.
- Haas, T., Schutter, J. D., Diehl, M., and Meyers, J.: Wake characteristics of pumping mode airborne wind energy systems, *Journal of Physics: Conference Series*, 1256, 012 016, <https://doi.org/10.1088/1742-6596/1256/1/012016>, 2019.
- Karakouzian, M. M., Kheiri, M., and Bourgault, F.: A survey of two analytical wake models for crosswind kite power systems, *Physics of*  
565 *Fluids*, 34, 097 111, <https://doi.org/10.1063/5.0102388>, 2022.
- Kaufman-Martin, S., Naclerio, N., May, P., and Luzzatto-Fegiz, P.: An entrainment-based model for annular wakes, with applications to airborne wind energy, *Wind Energy*, 25, 419–431, <https://doi.org/10.1002/we.2679>, 2021.
- Kheiri, M., Bourgault, F., Saberi Nasrabad, V., and Victor, S.: On the aerodynamic performance of crosswind kite power systems, *Journal of Wind Engineering and Industrial Aerodynamics*, 181, 1–13, <https://doi.org/10.1016/j.jweia.2018.08.006>, 2018.
- 570 Kheiri, M., Saberi Nasrabad, V., and Bourgault, F.: A new perspective on the aerodynamic performance and power limit of crosswind kite systems, *Journal of Wind Engineering and Industrial Aerodynamics*, 190, 190–199, <https://doi.org/10.1016/j.jweia.2019.04.010>, 2019.
- Kheiri, M., Victor, S., Rangriz, S., Karakouzian, M. M., and Bourgault, F.: Aerodynamic Performance and Wake Flow of Crosswind Kite Power Systems, *Energies*, 15, <https://doi.org/10.3390/en15072449>, 2022.
- Leuthold, R., Crawford, C., Gros, S., and Diehl, M.: Engineering Wake Induction Model For Axisymmetric Multi-Kite Systems, *Journal of*  
575 *Physics: Conference Series*, <https://doi.org/https://doi.org/10.1088/1742-6596/1256/1/012009>, 2019.
- Loyd, M.: Crosswind Kite Power, *Journal of Energy*, 4, 106–111, 1980.
- Marten, D., Lennie, M., Pechlivanoglou, G., Nayeri, C. N., and Paschereit, C. O.: Implementation, Optimization and Validation of a Non-linear Lifting Line Free Vortex Wake Module Within the Wind Turbine Simulation Code QBlade, Volume 9: Oil and Gas Applications; Supercritical CO2 Power Cycles; *Wind Energy*, <https://doi.org/10.1115/GT2015-43265>, 2015.

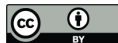

- 580 Mehr, J. A., Alvarez, E. J., and Ning, A.: Unsteady Aerodynamic Analysis of Wind Harvesting Aircraft, in: AIAA AVIATION 2020 FORUM, <https://doi.org/10.2514/6.2020-2761>, 2020.
- Phillips, W. F., Anderson, E. A., Jenkins, J. C., and Sunouchi, S.: Estimating the Low-Speed Downwash Angle on an Aft Tail, *Journal of Aircraft*, 39, 600–608, <https://doi.org/10.2514/2.2998>, 2002.
- Trevisi, F., Gaunaa, M., and McWilliam, M.: The Influence of Tether Sag on Airborne Wind Energy Generation., *Journal of Physics: Conference Series*, 1618, <https://doi.org/10.1088/1742-6596/1618/3/032006>, 2020a.
- 585 Trevisi, F., Gaunaa, M., and McWilliam, M.: Unified engineering models for the performance and cost of Ground-Gen and Fly-Gen crosswind Airborne Wind Energy Systems, *Renewable Energy*, 162, 893–907, <https://doi.org/10.1016/j.renene.2020.07.129>, 2020b.
- Trevisi, F., Croce, A., and Riboldi, C. E. D.: Flight Stability of Rigid Wing Airborne Wind Energy Systems, *Energies*, 14, <https://doi.org/10.3390/en14227704>, 2021a.
- 590 Trevisi, F., McWilliam, M., and Gaunaa, M.: Configuration optimization and global sensitivity analysis of Ground-Gen and Fly-Gen Airborne Wind Energy Systems, *Renewable Energy*, 178, 385–402, <https://doi.org/10.1016/j.renene.2021.06.011>, 2021b.
- Trevisi, F., Castro-Fernández, I., Pasquinelli, G., Riboldi, C. E. D., and Croce, A.: Flight trajectory optimization of Fly-Gen airborne wind energy systems through a harmonic balance method, *Wind Energy Science*, 7, 2039–2058, <https://doi.org/10.5194/wes-7-2039-2022>, 2022a.
- 595 Trevisi, F., Riboldi, C. E. D., and Croce, A.: Sensitivity analysis of a Ground-Gen Airborne Wind Energy System design., *Journal of Physics: Conference Series*, 2265, 042 067, <https://doi.org/10.1088/1742-6596/2265/4/042067>, 2022b.
- TU Berlin: QBlade next generation wind turbine design and simulation, <https://qblade.org/>, accessed 10 December, 2022.
- Vermillion, C., Cobb, M., Fagiano, L., Leuthold, R., Diehl, M., Smith, R. S., Wood, T. A., Rapp, S., Schmehl, R., Olinger, D., and Demetriou, M.: Electricity in the air: Insights from two decades of advanced control research and experimental flight testing of airborne wind energy systems, *Annual Reviews in Control*, 52, 330–357, <https://doi.org/10.1016/j.arcontrol.2021.03.002>, 2021.
- 600 Viré, A., Demkowicz, P., Folkersma, M., Roullier, A., and Schmehl, R.: Reynolds-averaged Navier-Stokes simulations of the flow past a leading edge inflatable wing for airborne wind energy applications, *Journal of Physics: Conference Series*, 1618, 032 007, <https://doi.org/10.1088/1742-6596/1618/3/032007>, 2020.
